# Supplementary material for: Ethanolic Extract from Fruits of Pintoa chilensis, a Chilean Extremophile Plant. Assessment of Antioxidant Activity and In Vitro Cytotoxicity
Source: MDPI journal article supplement (doi:10.3390/plants13101409), 2024-05-18
Supplement: s1 [file s1]

**Table S1.** Collection coordinates of the *P. chilensis* plant in the province of Copiapó, Atacama Region, Chile.

| Family                | Genus                                                                             | Collection location                                                      | Collection date |
|-----------------------|-----------------------------------------------------------------------------------|--------------------------------------------------------------------------|-----------------|
| <i>Zygophyllaceae</i> | <i>Pintoa chilensis</i> Gay                                                       | Biorestauración consultores<br>Provincia de Copiapó<br>Región de Atacama | 15-11-2020      |
|                       |  | 548 m n.s.m                                                              |                 |

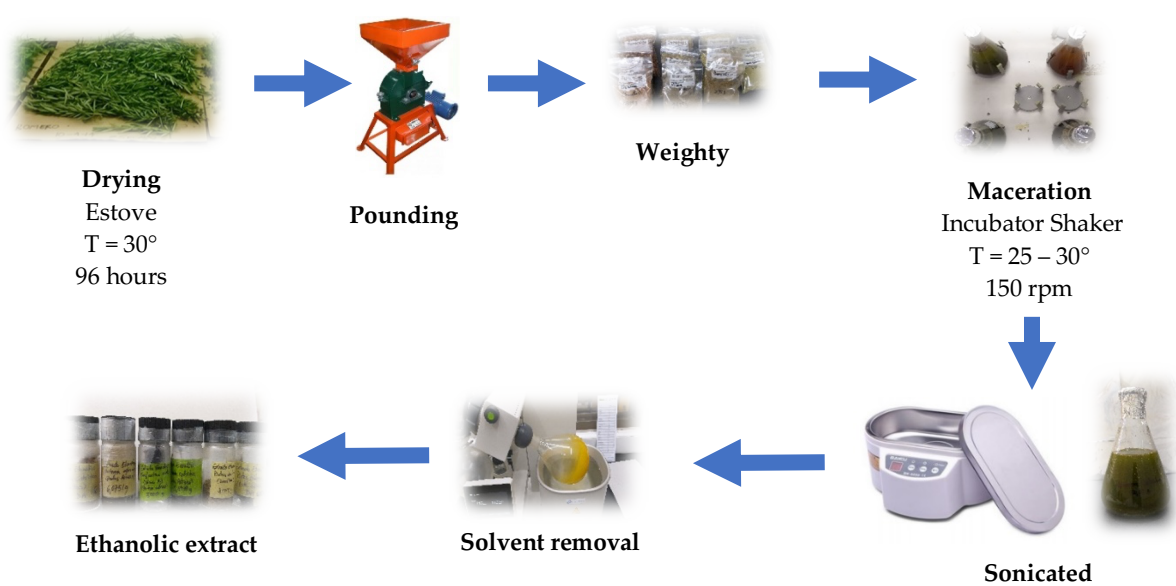

**Figure S1.** Preparation of ethanolic extract from *Pintoa chilensis* (ap and f).

**Table S2.** Percentage yield of the ethanol extract obtained from the *P. chilensis* plant.

| Plant                    | Initial Mass | Final Mass | Yield  |
|--------------------------|--------------|------------|--------|
| <i>P. chilensis</i> (ap) | 50.07 g      | 21.92 g    | 43.80% |
| <i>P. chilensis</i> (f)  | 50.08 g      | 15.25 g    | 30.45% |

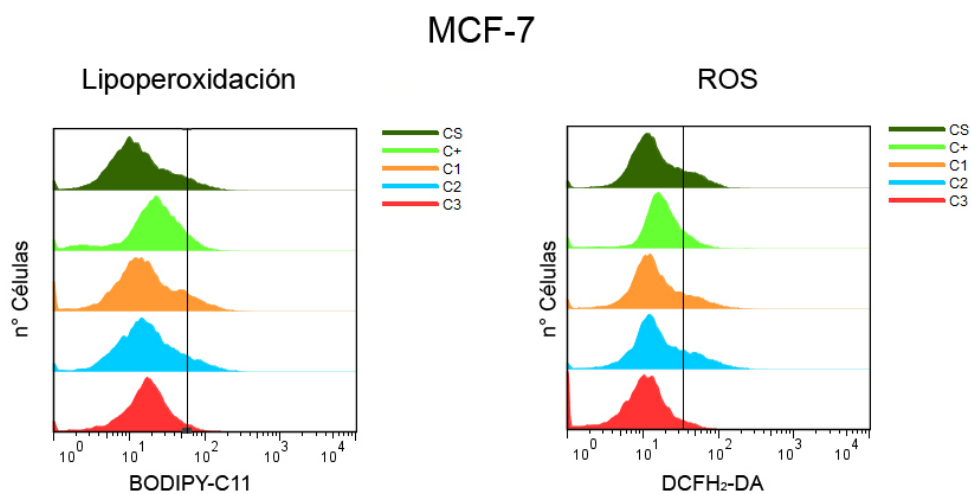

**Figure S2.** a) Histogram showing lipoperoxidation levels measured for the MCF-7 tumor cell line by flow cytometry with BOCIPY-C11 induced by the extract EF2. b) Histogram showing ROS levels measured for the MCF-7 tumor cell line by flow cytometry with DCFH<sub>2</sub>-DA induced by the extract EF2.

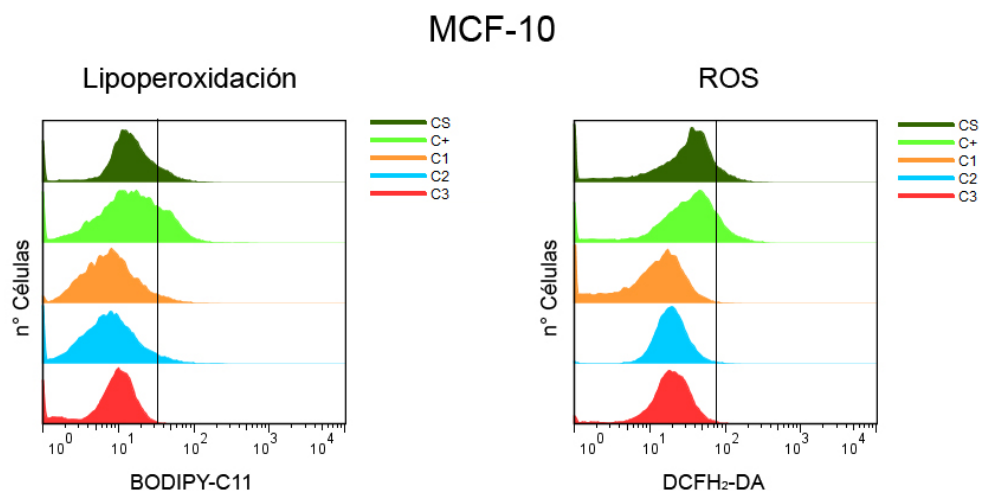

**Figure S3.** a) Histogram showing lipoperoxidation levels measured for the MCF-10A non-tumorous cell line by flow cytometry with BODIPY-C11. b) Histogram showing ROS levels measured for the MCF-10A non-tumorous cell line by flow cytometry with DCFH<sub>2</sub>-DA.

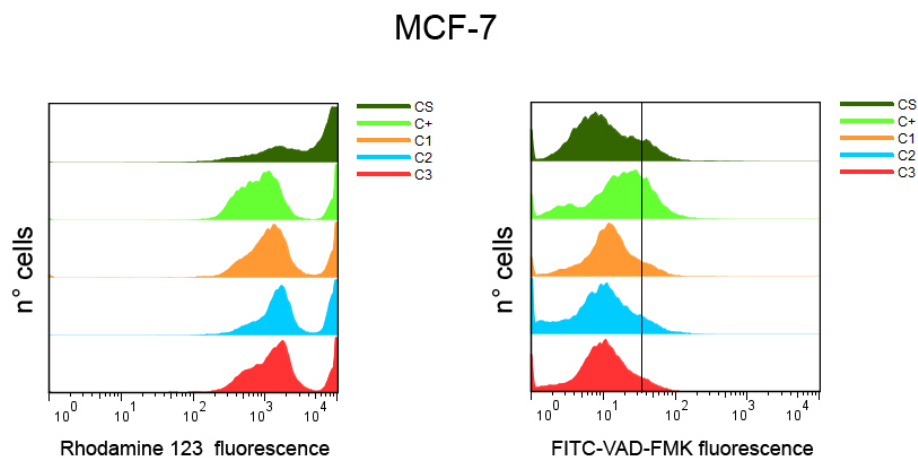

**Figure S4.** a) Histogram showing effect of mitochondrial membrane permeability in MCF-7 tumor cell line by flow cytometry with Rhodamine-123 (Rh-123) induced by the extract EF2. b) Histogram showing effect of caspase activation in MCF-7 tumor cell line by flow cytometry with FITC-VAD-FMK induced by the extract EF2.

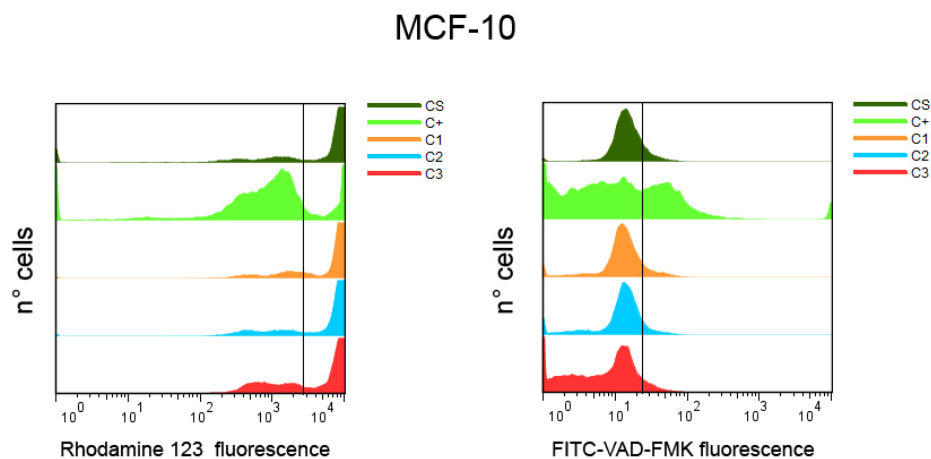

**Figure S5.** a) Histogram showing effect of mitochondrial membrane permeability in MCF-10A non-tumorous cell line by flow cytometry with Rhodamine-123 (Rh-123). b) Histogram showing effect of caspase activation in MCF-10A non-tumorous cell line by flow cytometry with FITC-VAD-FMK.

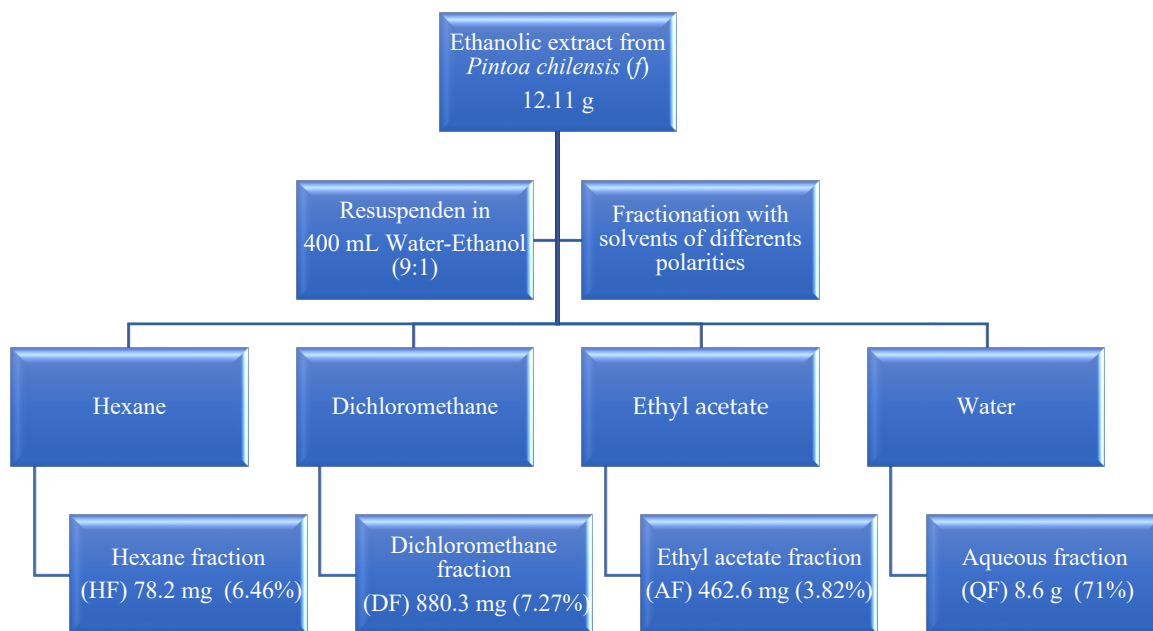

**Figure S6.** Liquid-liquid fractionation of ethanolic extract from *Pintoa chilensis* (f).

**Table S3.** GC-MS analysis for the dichloromethane fraction (DF) obtained from the ethanolic extract of *P. chilensis* (f).

| No. | RT     | Main compounds                                                           | RI   | RI ref | match | % Area |
|-----|--------|--------------------------------------------------------------------------|------|--------|-------|--------|
| 1   | 7.6474 | Unknown                                                                  | 974  | -      | -     | 1.35   |
| 2   | 9.2152 | Unknown                                                                  | 1043 | -      | -     | 0.43   |
| 3   | 9.4669 | 1-3-propanediol-di-TMS                                                   | 1053 | 1073   | 928   | 0.48   |
| 4   | 9.5985 | Unknown                                                                  | 1058 | -      | -     | 0.79   |
| 5   | 12.425 | Unknown                                                                  | 1136 | -      | -     | 0.08   |
| 6   | 14.125 | Urea, N,N'-bis(TMS)- (CAS)                                               | 1169 | 1243   | 899   | 0.19   |
| 7   | 15.235 | 3,7-Dioxa-2,8-disilanonane, 2,2,8,8-tetramethyl-5-[(TMS)oxy]             | 1191 | 1292   | 882   | 3.65   |
| 8   | 15.858 | Unknown                                                                  | 1255 | -      | -     | 0.45   |
| 9   | 20.356 | Butanedioic acid, [(TMS)oxy]                                             | 1497 | -      | 860   | 0.08   |
| 10  | 21.386 | Trimethyl(2,6 diter-butylphenoxy) silane                                 | 1544 | -      | 792   | 0.26   |
| 11  | 24.51  | 2-Methylresorcinol, bis(trimethylsilyl) ether                            | 1690 | 1455   | 707   | 0.49   |
| 12  | 25.105 | Levoglucozan, tris(trimethylsilyl)                                       | 1619 | 1697   | 856   | 0.09   |
| 13  | 25.649 | Xylitol, 1,2,3,4,5-pentakis-O-(trimethylsilyl)-                          | 1646 | 1744   | 748   | 0.13   |
| 14  | 26.473 | Tagatofuranose, pentakis(trimethylsilyl) ether                           | 1787 | 1813   | 767   | 0.32   |
| 15  | 27.171 | Unknown                                                                  | 1723 | -      | -     | 0.20   |
| 16  | 27.605 | Myristic acid-monotms                                                    | 1745 | 1842   | 888   | 3.52   |
| 17  | 27.92  | D-Pinitol, pentakis(trimethylsilyl) ether                                | 1762 | 1815   | 894   | 7.11   |
| 18  | 28.121 | Unknown                                                                  | 1773 | 1744   | 615   | 0.68   |
| 19  | 28.647 | Xylitol, 1,2,3,4,5-pentakis-O-(trimethylsilyl)                           | 1900 | 2153   | 685   | 0.29   |
| 20  | 28.796 | Hexopyranose, 1,2,3,4,6-pentakis-O-(pentakis)                            | 1808 | -      | 665   | 0.20   |
| 21  | 29.002 | Myoinositol TMS                                                          | 1819 | 1930   | 913   | 1.17   |
| 22  | 29.231 | D-Altrose, 2,3,4,5,6-pentakis-O-(Trimethylsilyl)                         | 1831 |        | 829   | 0.13   |
| 23  | 29.448 | 4,6-Pteridinediol, 2-trimethylsilamino-, O,O-bis(trimethylsilyl)-, ether | 1843 | 2179   | 674   | 0.45   |
| 24  | 29.826 | Ethyl 2,3,4,6-tetrakis-O-(TMS)-D-Glucopyranoside                         | 1864 | 2027*  | 848   | 0.22   |
| 25  | 30.701 | $\beta$ -D-Allopyranose, pentakis(trimethylsilyl) ether                  | 1912 | 1829   | 902   | 1.32   |
| 26  | 31.176 | Hexadecanoic acid, trimethylsilyl ester                                  | 1939 | 2039   | 940   | 0.88   |
| 27  | 31.279 | Unknown                                                                  | 1945 |        |       | 0.16   |
| 28  | 32.155 | D-(+)-Turanose, octakis(trimethylsilyl) ether                            | 2094 | 2693   | 722   | 0.18   |
| 29  | 32.618 | D-(+)-Galacturonic acid, O-pentakis(trimethylsilyl) deriv.               | 2022 | 1943   | 674   | 0.22   |
| 30  | 33.35  | 4-Nitrophenyl- $\beta$ -D-galacturonide, tris(trimethylsilyl) ether      | 2065 | 2837   | 676   | 0.35   |
| 31  | 33.837 | d-Glucopyranose, 1-C-octyl-2,3,4,6-tetra-O-trimethylsilyl                | 2194 | 2698*  | 673   | 0.23   |
| 32  | 34.071 | Lauric acid, 2,3-bis(trimethylsiloxy)propyl ester                        | 2108 | 2227   | 788   | 0.14   |
| 33  | 34.512 | Octadecanoic acid, trimethylsilyl ester                                  | 2235 | 2236   | 926   | 0.87   |
| 34  | 37.104 | Myristic acid, 2,3-bis(trimethylsiloxy)propyl ester                      | 2399 | 2424   | 899   | 0.31   |
| 35  | 39.496 | 2-Monopalmitoylglycerol trimethylsilyl ether                             | 2557 | 2576   | 880   | 1.36   |
| 36  | 40.034 | Hexadecanoic acid, 2,3-bis[(trimethylsilyl)oxy]propyl ester              | 2596 | 2613   | 855   | 5.74   |
| 37  | 41.43  | Sucrose, octakis(trimethylsilyl) ether                                   | 2696 | 2610   | 950   | 0.89   |

**Table S3.** Continuation....

| No. | RT     | Main compounds                                              | RI   | RI ref | match | % Area |
|-----|--------|-------------------------------------------------------------|------|--------|-------|--------|
| 38  | 42.168 | 2-Monostearin trimethylsilyl ether                          | 2751 | 2775   | 895   | 1.31   |
| 39  | 42.265 | Unknown                                                     | 2758 | -      | -     | 0.19   |
| 40  | 42.683 | Octadecanoic acid, 2,3-bis[(trimethylsilyl)oxy]propyl ester | 2789 | 2808   | 856   | 4.68   |
| 41  | 44.136 | Unknown                                                     | 2900 | -      | -     | 0.38   |
| 42  | 45.201 | Unknown                                                     | 2985 | -      | -     | 0.14   |
| 43  | 50.78  | Unknown                                                     | 3532 | -      | -     | 2.89   |

<sup>a</sup> RI: Retention indexes relative to C<sub>7</sub>-C<sub>40</sub> n-alkanes on the BP-5MS capillary column. <sup>b</sup> Retention index reported in the literature.

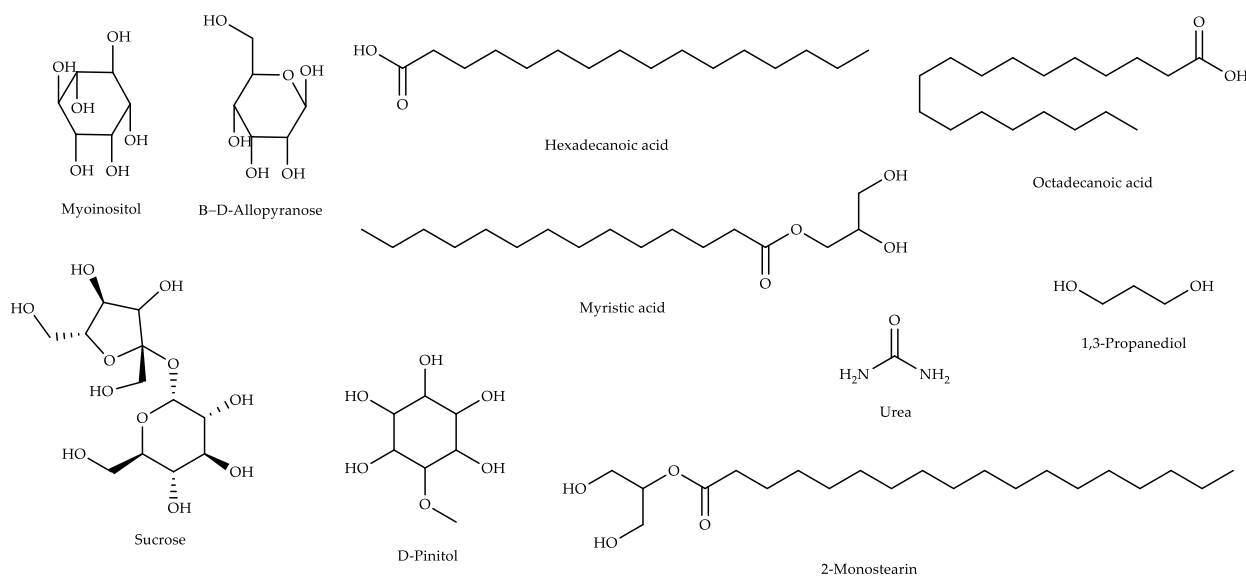

**Figure S7.** Chemical structures of compounds detected in GC-MS analysis of dichloromethane fraction obtained from ethanolic extract from *Pintoa chilensis* (f).
